# Supplementary material
Source: MDPI journal article supplement (https://www.mdpi.com/2075-163X/8/11/513)

## Online Resource ESM 1

### Back-scattered image of a slag phase from A, B and C horizons and complementary EDX spectral map (GXMAP) by the automated SEM Mineral Liberation Analysis (MLA).

In: Diverse sources and weathering processes in Zn-Pb slag heap detected by automated SEM Mineral Liberation Analysis: a prospective tool to understand complex substrates for Technosol development by Pietranik A.<sup>1</sup>, Kierczak J.<sup>1</sup>, Tyszkla R.<sup>2</sup>, Schulz B.<sup>3</sup>

1 University of Wrocław, Dept. of Earth Sciences and Environmental Management, Institute of Geological Sciences, pl. Borna 9, 50-204 Wrocław, Poland ([anna.pietranik@uwr.edu.pl](mailto:anna.pietranik@uwr.edu.pl), [jakub.kierczak@uwr.edu.pl](mailto:jakub.kierczak@uwr.edu.pl))

2 Wrocław University of Environmental And Life Sciences, Department of Soil Sciences and Environmental Protection, C.K. Norwida 25/27, 50-375 Wrocław, Poland (correspondence: [rafal.tyszkla@up.wroc.pl](mailto:rafal.tyszkla@up.wroc.pl))

3 Dept. Economic Geology and Petrology, Institute of Mineralogy at TU Freiberg  
Brennhausgasse 14, D-09596 Freiberg/Saxony, Germany, [Bernhard.Schulz@mineral.tu-freiberg.de](mailto:Bernhard.Schulz@mineral.tu-freiberg.de)

\* Corresponding author, e-mail: [anna.pietranik@uwr.edu.pl](mailto:anna.pietranik@uwr.edu.pl)

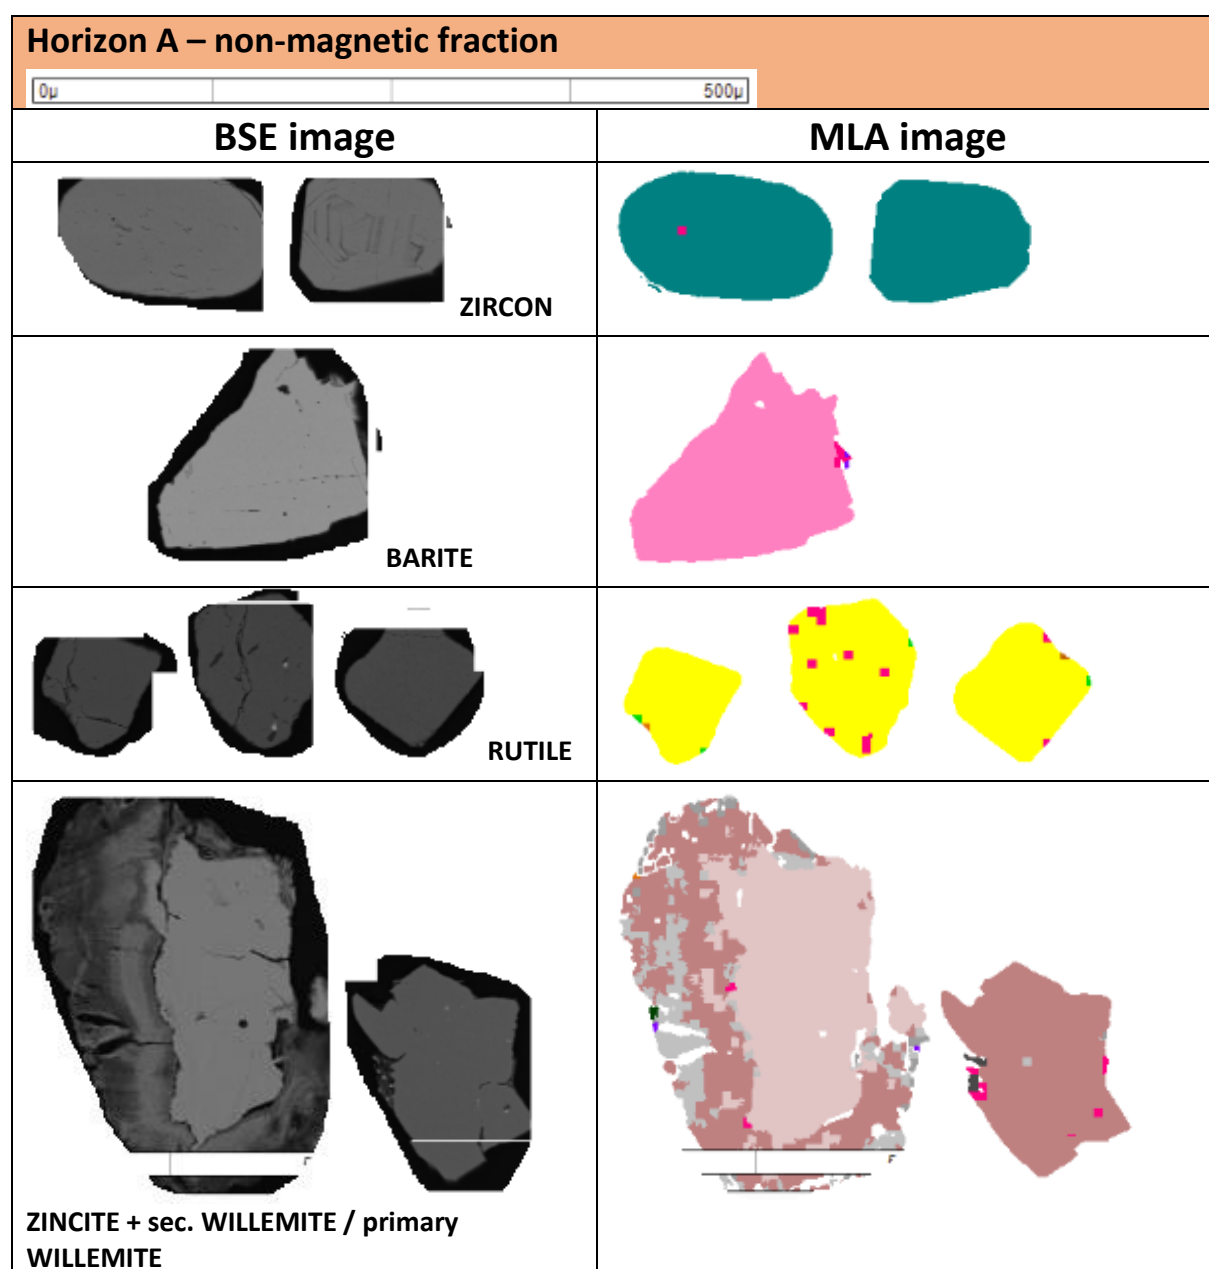

|                                                                                                                                                     |                                                                                      |
|-----------------------------------------------------------------------------------------------------------------------------------------------------|--------------------------------------------------------------------------------------|
| 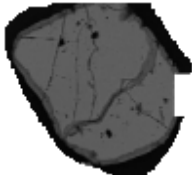 <p><b>PIRITE</b></p>                                              | 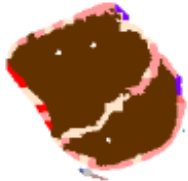    |
| 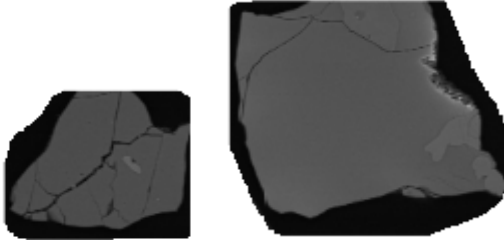 <p><b>Pb-HARDYSTONITE + spinel and multi-phases</b></p>           | 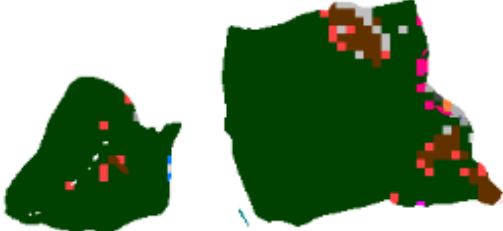   |
| 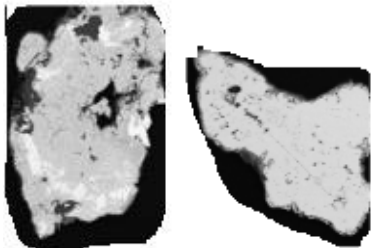 <p><b>Pb-OXIDE</b> surrounded by GLASS (secondary silica gel)</p> | 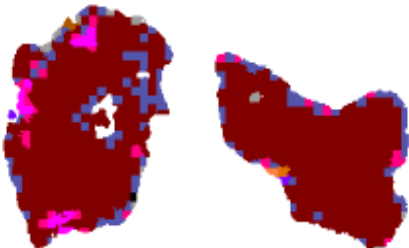   |
| <b>Horizon A – magnetic fraction</b>                                                                                                                |                                                                                      |
| 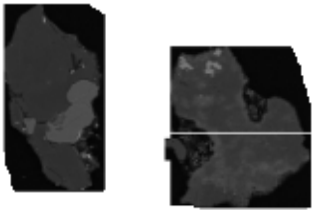 <p><b>DIOPSIDE</b> with spinels and multi-phases</p>            | 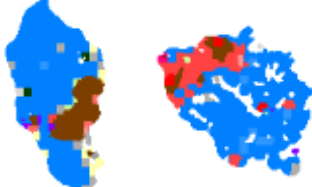 |
| 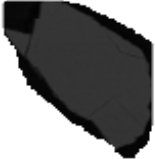 <p><b>GLASS</b></p>                                             | 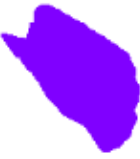  |

|                                                                                                                                 |                                                                                      |
|---------------------------------------------------------------------------------------------------------------------------------|--------------------------------------------------------------------------------------|
| 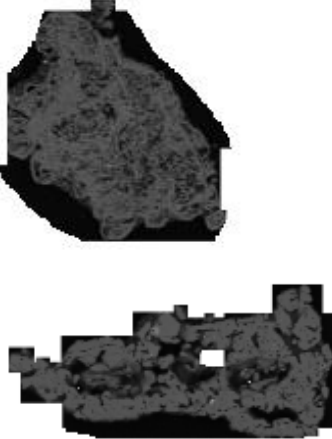 <p>HEMATITE with spinels and multi-phases</p> | 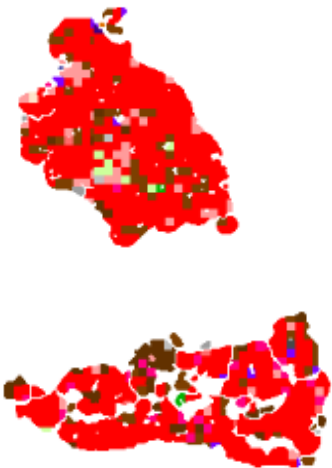   |
| 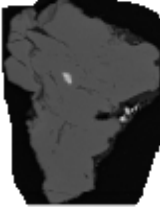 <p>FRANKLINITE</p>                            | 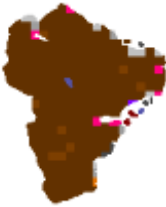    |
| <p><b>Horizon B – non-magnetic</b></p> <div> <div>0μ</div> <div>500μ</div> </div>                                               |                                                                                      |
| 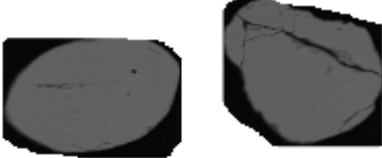 <p>ZIRCON</p>                               | 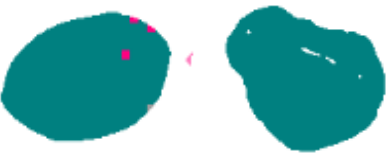 |
| 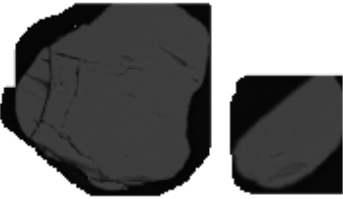 <p>RUTILE</p>                               | 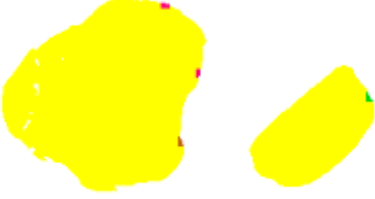 |
| 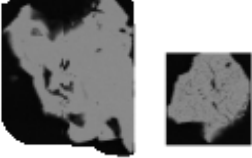 <p>BARITE</p>                               | 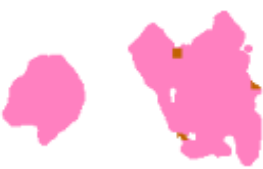 |
| 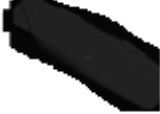 <p>CHLORITOID</p>                           | 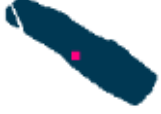  |
| 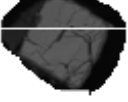 <p>PIRITE</p>                               | 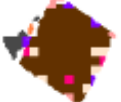  |

|                                                                                                                                                            |                                                                                      |
|------------------------------------------------------------------------------------------------------------------------------------------------------------|--------------------------------------------------------------------------------------|
| 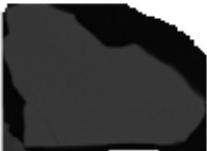 <p><b>TITANITE</b></p>                                                   | 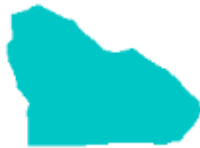   |
| <b>Horizon B – magnetic</b> <div> <div>0μ</div> <div></div> <div></div> <div>500μ</div> </div>                                                             |                                                                                      |
| 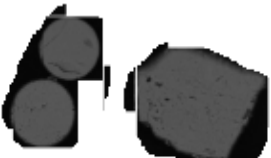 <p><b>HEMATITE</b></p>                                                   | 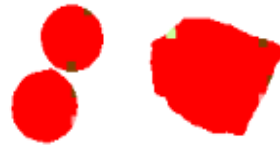   |
| 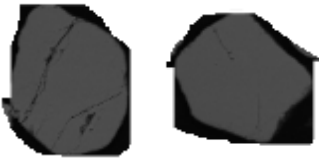 <p><b>ILMENITE</b></p>                                                   | 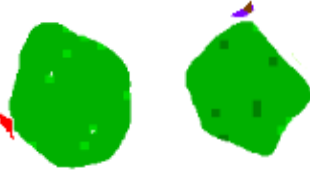   |
| 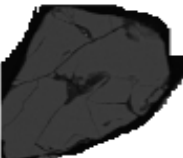 <p><b>GARNET (identified as glass)</b></p>                              | 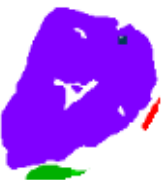   |
| 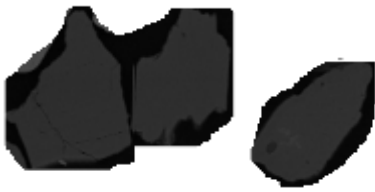 <p><b>ZOISITE (identified as multi-phase)</b></p>                      | 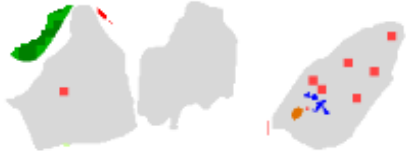 |
| <b>Horizon C – non-magnetic</b> <div> <div>0μ</div> <div></div> <div></div> <div>500μ</div> </div>                                                         |                                                                                      |
| 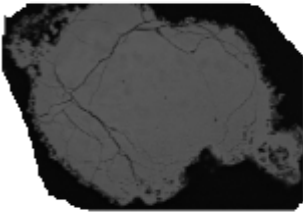 <p><b>Pb-HARDYSTONITE surrounded by WILLEMITE and multi-phases</b></p> | 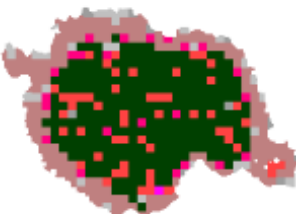 |

|                                                                                                                                                 |                                                                                      |
|-------------------------------------------------------------------------------------------------------------------------------------------------|--------------------------------------------------------------------------------------|
| 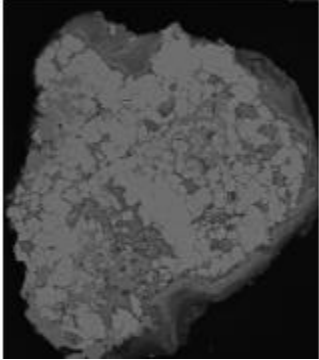 <p><b>ZINCITE and<br/>PRIMARY and SECONDARY WILLEMITE</b></p> | 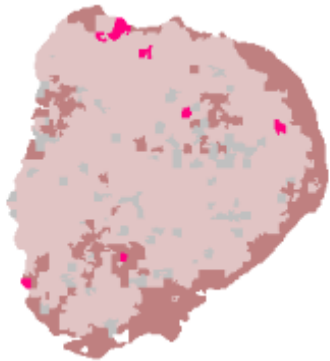   |
| <p><b>PRIMARY WILLEMITE</b></p>                                                                                                                 | 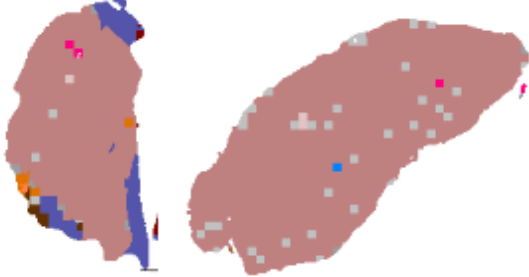   |
| <p><b>Horizon C – magnetic</b></p> <div data-bbox="212 1048 948 1081"> <span>0μ</span> <span>500μ</span> </div>                                 |                                                                                      |
| 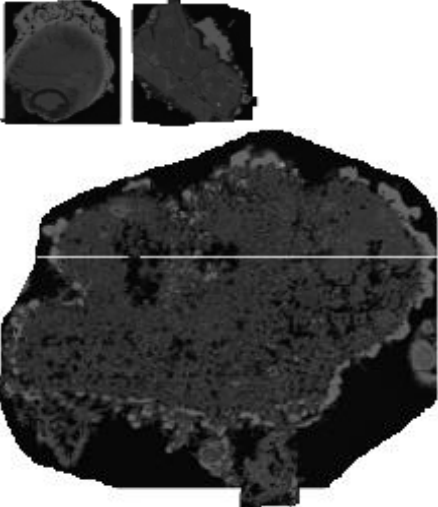 <p><b>DIOPSIDE and MULTI-PHASES</b></p>                     | 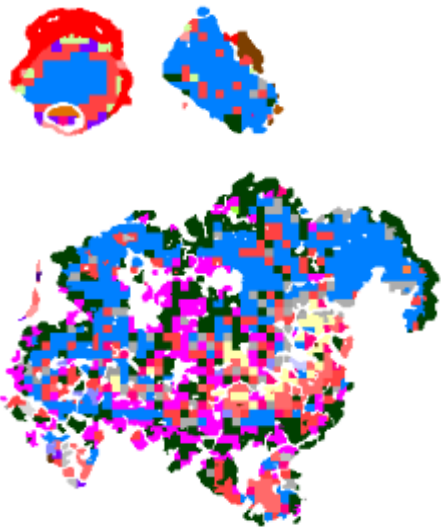 |
| 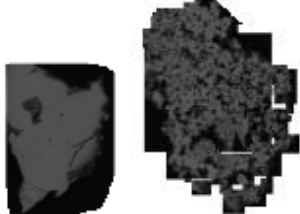 <p><b>SPINEL and MULTI-PHASES</b></p>                       | 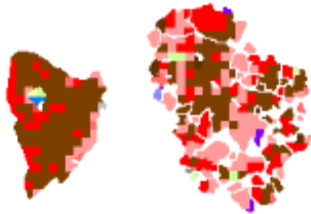 |

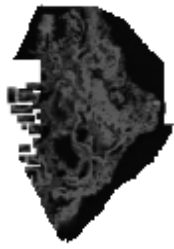

**HEMATITE and SPINEL**

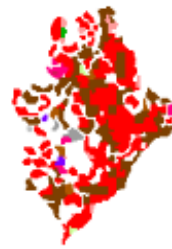

Supplement: s1 [file s1 › Online Resource ESM 2.pdf]
