# Supplementary material
Source: MDPI journal article supplement (https://www.mdpi.com/2075-163X/8/11/513)
Supplement: s1 [file s1]

Archive with 2 entries (2 files):
- Online Resource ESM 2.pdf
- Kopia Online Resource ESM 1new.xlsx
