# Supplementary material
Source: MDPI journal article supplement (https://www.mdpi.com/2075-163X/8/11/513)
Supplement: s1 [file s1 › Kopia Online Resource ESM 1new.xlsx]

## Sheet: ESM1_1
		element concentration in magnetic heavy mineral fraction	element concentration in non-magnetic heavy mineral fraction	elemental concentration in bulk sample	% non-heavy fraction	% non-heavy+magnetic fraction	% non-mag fraction	% magnetic fraction
		[mg/kg]	[mg/kg]
horizon A	Zr	0	106500	244	not estimated	0.997709	0.00229108	not estimated
horizon A	Ti	78000	115200	2397	0.970362		as calculated for Zr	0.0296381		ASSUMPTION: All Zr resides in zircon mineral in non-magnetic fraction
horizon A	Zn	62000	137900	8830	0.860385		as calculated for Zr	0.139615
horizon A	Pb	54000	14400	3320	0.936832		as calculated for Zr	0.0631681
horizon A	Cr	11600	0	930	0.917537		as calculated for Zr	0.0824635		ASSUMPTION: All Cr resides in chromite mineral in magnetic fraction
horizon B	Zr	0	132200	349	not estimated	0.99736	0.00263994	not estimated		ASSUMPTION: All Zr resides in zircon mineral in non-magnetic fraction

## Sheet: ESM1_2
Table ESM1_2 Modal abundances for all phases exceeding 1 % Area
Magnetic Phases
HORIZON C				HORIZON B				HORIZON A
Mineral	Area%			Mineral	Area%			Mineral	Area%
P-DiopsideAl	5.9			P-Quartz	1			P-Quartz	1
P-Glass	4.3			P-DiopsideAl	1.9			P-DiopsideAl	12.4
P-Olivine	1			P-Glass	7.3			P-Diopside	1
P-Gahnite-Spinel	8.7			P-Gahnite-Spinel	2.8			P-Glass	5.6
P-Franklinite-Spinel	5.8			P-Franklinite-Spinel	1			P-Olivine	3
P-Willemite	3.4			P-Ilmenite with Mn	8.7			P-Gahnite-Spinel	7.6
P-Hardystonite-Pb	2.1			D-Chloritoid	1.9			P-Franklinite-Spinel	8.6
S-FeCaO	6			D-Pyrite	1.2			P-Willemite	2.8
S-Hematite	20.4			D-Rutile	1.1			P-Hardystonite-Pb	2.5
S-SilicateAlCaPb-mix	1.6			D-Ilmenite	4.1			D-Chloritoid	1
S-ZnFeOSilicatemixPb	4.9			S-FeCaO	4.6			S-FeCaO	2.6
S-SilicateOxidePb-mix2	2.8			S-Hematite	46.9			S-Hematite	20.1
S-FeMgOPb-mix	12.8			S-SilicateAlCaPb-mix	3.6			S-SilicateAlCaPb-mix	1.8
S-OxideSilMix	4			S-FeMgOPb-mix	3			S-ZnFeOSilicatemixPb	2.8
S-SilOxMix	5.4			S-SilOxMix	2			S-SilicateAlCaPb-mix3	1.4
Unknown	2			Unknown	2			S-SilicateOxidePb-mix2	2.3
Total	91.1			Total	93.1			S-FeMgOPb-mix	5
								S-OxideSilMix	2
								S-SilOxMix	4.8
								Unknown	2.5
								Total	90.8
Non-magnetic Phases
HORIZON C				HORIZON B				HORIZON A
Mineral	Area%			Mineral	Area%			Mineral	Area%
P-Quartz	1.7			P-Quartz	2.7			P-Quartz	4.4
P-Orthoclase	1.3			P-Almandine	1			P-DiopsideAl	1.8
P-DiopsideAl	1.6			P-SphaleriteCd	2.1			P-Willemite	13.8
P-Franklinite-Spinel	1			D-Chloritoid	9.8			P-Zincite	4.1
P-Willemite	26.1			D-Zircon	21.3			P-SphaleriteCd	1.5
P-Zincite	2.4			D-Pyrite	9.4			P-Hardystonite-Pb	3.1
P-SphaleriteCd	5			D-Barite	8.9			P-Pb-Oxide	5.7
P-Hardystonite-Pb	20.7			D-Apatite	1			P-Pb-silicate	1.4
P-Pb-Oxide	6.2			D-Titanite	1.1			D-Chloritoid	8.7
P-Pb-silicate	1.5			D-Rutile	24.4			D-Zircon	15.2
D-Barite	1.2			S-Hematite	1.2			D-Pyrite	2.7
S-ZnFeOSilicatemixPb	4.7			S-SulphateKFe	1.2			D-Barite	2.1
S-SilicateOxidePb-mix2	7.6			S-SilicateAlCaPb-mix	3.8			D-Rutile	14.8
S-PbCaZnSiO	3.9			S-FeMgOPb-mix	1.1			S-SilicateAlCaPb-mix	2.1
S-SiPbAlZnKFeSnO	1.9			Unknown	5			S-SilicateOxidePb-mix2	1.6
S-SilOxMix	1.2			Total	94			S-SiPbAlZnKFeSnO	1
H-HyalophanePb	1.6							Unknown	6.7
Unknown	3.4							Total	90.7
Total	93

## Sheet: ESM1_3
Sample	PS001	PS003	PS006	PS007	PS008
wt%	Site 1 WSZ	Site 1 WSZ	Site 1 WSZ	Site 1 CSZ	Site 1 CSZ	% of material from C horizon in A horizon	% metal from C horizon
SiO2	26	23.2	25	70.6	69.5	2.41228
Al2O3	6.4	7.7	7.4	7.7	6.8
Fe2O3	22.4	26.2	22.7	3.4	6.8	17.6166
MgO	9.6	8.3	5.4	0.6	1.6	20.8333
CaO	16.6	16.1	13.7	0.9	3.5	20.3125
Na2O	0.1	0.1	0.1	0.5	0.3	50
K2O	0.6	0.5	0.7	1.8	1.5	27.2727
TiO2	0.3	0.3	0.3	0.6	0.4	66.6667
P2O5	0.1	0.2	0.1	0.1	0.1
MnO	0.7	1	0.7	0.1	0.2	16.6667
TOT/S	3.6	2.4	2.3	0.1	0.5	18.1818
LOI	12.6	11	15.4	13.5	7.6
Sum	95.3	94.7	91.5	99.7	98.3
mg/kg
Ba	835	1337	1912	492	543	3.59155	12.6465
Co	21.8	36.9	30.1	34.2	33.7	12.1951	10.8924
Rb	24	24.5	36.8	68.6	58.2	32.7044	20.6791
Sr	177	268	274	85.1	98.9	7.30545	20.2396
Cu	36.3	54.9	77.8	28.3	32	7.47475	18.173
Pb	8280	8770	15580	250	3320	20.0261	93.9779
Zn	21250	24260	44090	850	8830	18.4551	92.1503
Ni	64	115	92.9	21.9	33.1	15.7746	44.2739
As	1033	1142	1645	25	341	19.5062	94.0987
Cd	110	123	575	8.15	26.3	3.20191	70.0036
Ag	28.6	29.2	42.9	0.71	8.94	19.507	93.6074
Pb206/Pb207	1.183	1.175	1.178	1.182	1.176

## Sheet: ESM1_4
Table ESM1_4a Proportions of minerals associated with each other in horizon C, e.g. 24% of gahnite-spinel is associated with hematite.
Mineral	P-DiopsideAl	P-Glass	P-Olivine	P-Gahnite-Spinel	P-Franklinite-Spinel	S-FeCaO	S-Hematite	S-SilicateAlCaPb-mix	S-ZnFeOSilicatemixPb	S-SilicateOxidePb-mix2	S-FeMgOPb-mix	S-OxideSilMix	S-SilOxMix
P-DiopsideAl	0	5.05	1.77	2.37	1.77	4.89	2.38	6.29	1.17	2.1	2.67	1.53	18.62
P-Glass	4.54	0	0.77	6.48	3.04	6.99	6.89	3.02	4.19	4.31	11.71	6.56	7.08
P-Olivine	7.63	3.69	0	4.61	1.69	2.19	4.17	0.56	0.92	3.63	9.78	16.33	2.19
P-Gahnite-Spinel	1.22	3.71	0.55	0	5.8	7.4	24.24	0.24	2.47	0.87	16.02	4.58	3.06
P-Franklinite-Spinel	1.55	2.98	0.35	9.94	0	5.98	14.7	0.23	14.43	1.01	4.44	3.16	3.88
S-FeCaO	3.29	5.23	0.34	9.68	4.57	0	17.52	0.5	2.1	0.55	14.2	2.9	12.5
S-Hematite	0.93	2.99	0.38	18.39	6.51	10.16	0	0.24	1.84	0.41	20.62	2.01	2.57
S-SilicateAlCaPb-mix	22.96	12.26	0.47	1.69	0.96	2.72	2.22	0	1.11	5.74	0.83	0.27	15.75
S-ZnFeOSilicatemixPb	1.09	4.32	0.2	4.45	15.18	2.89	4.38	0.28	0	5.7	4.58	4.73	2.94
S-SilicateOxidePb-mix2	2.9	6.62	1.16	2.34	1.58	1.13	1.44	2.17	8.48	0	2.94	5.85	4.06
S-FeMgOPb-mix	1.08	5.28	0.92	12.64	2.04	8.56	21.43	0.09	2	0.86	0	8.48	1.73
S-OxideSilMix	1.39	6.62	3.43	8.09	3.25	3.92	4.68	0.07	4.63	3.85	18.99	0	2.29
S-SilOxMix	15.26	6.46	0.42	4.88	3.61	15.26	5.42	3.53	2.6	2.42	3.49	2.07	0
Table ESM1_4b Proportions of minerals associated with each other in horizon A, e.g. 22,6% of gahnite-spinel is associated with hematite.
Mineral	P-DiopsideAl	P-Glass	P-Olivine	P-Gahnite-Spinel	P-Franklinite-Spinel	S-FeCaO	S-Hematite	S-SilicateAlCaPb-mix	S-ZnFeOSilicatemixPb	S-SilicateOxidePb-mix2	S-FeMgOPb-mix	S-OxideSilMix	S-SilOxMix
P-DiopsideAl	0	6.64	2.55	5.28	2.71	3.24	2.29	3.82	1.03	2.41	1.55	1.32	16.02
P-Glass	8.39	0	3.08	6.81	4.27	4.34	9.32	1.85	3.52	3.84	5.78	3.48	4.76
P-Olivine	7.66	7.32	0	5.29	2.74	0.53	3.92	0.32	1.05	5.27	4.89	13.1	0.96
P-Gahnite-Spinel	5.9	6.02	1.97	0	8.18	4.76	22.62	0.32	1.27	1.09	10.38	3.77	5.62
P-Franklinite-Spinel	3.57	4.44	1.2	9.62	0	3.27	10.34	0.21	13.36	1.55	1.92	3.45	4.17
S-FeCaO	7.33	7.76	0.4	9.62	5.63	0	20.62	0.49	1.34	0.56	9.39	1.94	12.3
S-Hematite	1.67	5.38	0.95	14.79	5.75	6.66	0	0.14	1.12	0.5	13.06	1.76	1.76
S-SilicateAlCaPb-mix	22	8.45	0.62	1.68	0.94	1.26	1.1	0	1.17	7.17	0.49	0.4	17.65
S-ZnFeOSilicatemixPb	2.38	6.45	0.81	2.63	23.56	1.38	3.56	0.47	0	4.75	1.8	3.68	2.56
S-SilicateOxidePb-mix2	6.55	8.25	4.77	2.66	3.21	0.68	1.85	3.38	5.57	0	1.89	4.33	3.1
S-FeMgOPb-mix	2.21	6.52	2.32	13.23	2.08	5.92	25.46	0.12	1.11	0.99	0	6.85	1.82
S-OxideSilMix	3.43	7.13	11.28	8.73	6.79	2.23	6.24	0.18	4.12	4.13	12.44	0	2.02
S-SilOxMix	26.82	6.3	0.53	8.42	5.31	9.11	4.03	5.12	1.85	1.91	2.14	1.31	0
	P-DiopsideAl	P-Glass	P-Olivine	P-Gahnite-Spinel	P-Franklinite-Spinel	S-FeCaO	S-Hematite	S-SilicateAlCaPb-mix	S-ZnFeOSilicatemixPb	S-SilicateOxidePb-mix2	S-FeMgOPb-mix	S-OxideSilMix	S-SilOxMix
diopside		1.31485	1.44068	2.22785	1.53107	0.662577	0.962185	0.607313	0.880342	1.14762	0.580524	0.862745	0.860365
glass	1.84802		4	1.05093	1.40461	0.620887	1.35269	0.612583	0.840095	0.890951	0.493595	0.530488	0.672316
olivine	1.00393	1.98374		1.14751	1.6213	0.242009	0.940048	0.571429	1.1413	1.45179	0.5	0.802205	0.438356
P-Gahnite-Spinel	4.83607	1.62264	3.58182		1.41034	0.643243	0.933168	1.33333	0.51417	1.25287	0.64794	0.823144	1.8366
P-Franklinite-Spinel	2.30323	1.48993	3.42857	0.967807		0.546823	0.703401	0.913043	0.925849	1.53465	0.432432	1.09177	1.07474

## Sheet: ESM1_5
	NON-MAGNETIC				MAGNETIC				NON-MAGNETIC				MAGNETIC
Mineral	Pb - hor. C	Pb - hor. B	Pb - hor. A		Pb - hor. C	Pb - hor. B	Pb - hor. A		Zn - hor. C	Zn - hor. B	Zn - hor. A		Zn - hor. C	Zn - hor. B	Zn - hor. A
P-Diopside	0	0	0		0	0	0		0.04	0.01	0.09		0.11	0.23	0.25
P-Olivine	0	0	0		0	0	0		0.01	0	0.04		0.12	0.14	0.34
P-Spinel	0	0	0		0	0	0		0.02	0.21	0.03		0.68	2.34	0.91
P-Gahnite-Spinel	0	0	0		0	0	0		0.02	0.98	0.05		19	41.03	15.05
P-Franklinite-Spinel	0	0	0		0	0	0		1.13	0.27	0.56		25.93	30.12	34.71
P-Willemite	0	0	0		0	0	0		58.33	5.05	51.68		31.09	5.96	23.56
P-Zincite	0	0	0		0	0	0		12.29	8.83	35.84		1.11	0.02	2.42
P-SphaleriteFe	0	0	0		0	0	0		0.03	0.08	0.02		0.18	0.09	4.63
P-SphaleriteCd	0	0	0		0	0	0		16.72	81.75	8.58		2.88	4.03	5.8
P-Hardystonite-Pb	9.59	1.06	15.5		26.78	0.71	7.27		7.96	0.19	1.99		3.25	0.52	3.53
P-Pb-Oxide	13.53	6.05	19.66		40.74	25.15	67.69		0	0	0		0	0	0
P-Pb-silicate	3.14	0.32	8.04		6.15	8.2	10.59		0.03	0.04	0.06		0.02	0	0.03
D-Cassiterite	0	0.09	0		0	3.31	0		0	0.05	0		0	0	0
S-CaFeOxideCarb-mix	0	0	0		0	0	0		0	0.03	0		0.07	0.58	0.02
S-SilicateAlCaPb-mix	2.96	32.07	4.5		0.43	26.1	1.99		0.01	0.56	0.04		0.08	1.27	0.08
S-ZnFeOSilicatemixPb	8.18	1.29	6.34		2.16	0.4	0.62		1.85	0.31	0.49		7.96	1.82	4.15
S-SilicateAlCaPb-mix3	0.92	0.41	2.39		0.3	0.37	0.51		0.02	0.02	0.03		0.07	0.04	0.12
S-SilicateOxidePb-mix2	12.04	4.17	13.13		9.09	10.69	3.41		0.81	0.86	0.28		1.23	0.62	0.9
S-PbCaZnSiO	3.71	0.06	3.37		8.36	0.39	1.61		0.53	0.02	0.09		0.27	0.01	0.17
S-SiPbAlZnKFeSnO	1.6	1.39	4.55		3.74	1.06	3.63		0.07	0.02	0.06		0.03	0.04	0.06
S-FeMgOPb-mix	33.5	36.4	17.69		0.05	10.06	0.38		0	0.47	0.02		2	3.15	0.71
S-OxideSilMix	0	0	0		0	0	0		0.01	0.01	0.01		1.47	0.29	0.68
S-SilOxMix	0	0	0		0	0	0		0.11	0.18	0.02		2.19	5.49	1.78
S-IlmeniteMix	0	0	0		0	0	0		0	0.01	0		0.03	1.65	0.04
H-HyalophanePb	1.94	4.08	1.9		1.95	11.12	1.99		0	0	0		0	0	0
H-PbPyrolusiteZn	8.22	9.33	2.8		0.24	2.45	0.32		0.01	0.05	0.01		0.2	0.32	0.04
H-PyrolusitePbZn	0.68	3.28	0.12		0	0	0		0	0	0		0.03	0.24	0
Total	100	100	100		100	100	100		100	100	100		100	100	100
% in secondary	62.91	75.79	51.97		24.13	49.07	12.15		3.41	2.49	1.04		15.4	14.96	8.71
% in primary	23.12	7.11	35.16		67.52	25.86	74.96		96.51	97.36	98.79		84.24	84.25	90.95

## Sheet: ESM1_6
Table ESM1_6 Cumulative proportion of each phase in liberation classes at 5% step (100 - fully liberated, i.e. not associated with any other phase within the particle) and the resulting IMLA index
PHASE		LIBERATION CLASSES
Horizon C		0	5	10	15	20	25	30	35	40	45	50	55	60	65	70	75	80	85	90	95	100	IMLA
SilOxMix		100	70.02	49	34.09	22.84	16.15	12.31	9.89	7.86	6.16	5.17	4.71	3.53	3.09	2.73	2.18	2.03	1.94	1.85	1.79	1.7	7.07988
OxideSilMIx		100	62.63	41.47	31.19	24.87	21.84	19.78	16.94	15.34	13.25	12.38	10.54	9.54	8.86	7.44	7.08	6.77	6.47	6.26	6.1	5.94	3.69717
FeMgOPb mix		100	82.73	64.29	52.01	43.2	36.06	28.78	24.7	20.3	16.25	13.5	10.9	9.07	7.04	6.44	6.06	5.32	4.27	4.05	3.54	3.36	3.34939
SilOxidePb-mix2		100	59.53	46.7	39.07	32.36	28.35	25.75	22.62	21.03	19.86	18.26	16	15.27	14.46	13.85	13.13	12.04	11.51	11	9.55	8.86	2.63174
ZnFeOSilicatemixPb		100	69.15	48.99	38.72	31.35	27.74	26.07	20.27	16.06	13.78	12.09	11.3	9.54	7.42	7.13	4.17	3.76	3.59	3.41	3.3	3.18	3.41145
Hematite		100	99.43	98.31	96.77	94.87	92.55	90.32	87.67	85.01	81.43	77.37	73.22	67.07	61.74	55.91	49.71	43.27	34.8	25.16	11.21	1.71	1.13414
FeCaO		100	58.81	39.84	26.39	17.96	13.85	9.77	7.21	6.7	5.03	4.85	3.08	2.14	1.99	1.88	1.72	1.47	1.41	1.38	1.37	1.35	8.15673
Franklinite		100	95.61	89.96	84.92	79.35	72.57	65.94	60.76	56.04	50.9	45.7	42.45	38.88	35.11	30.55	26.8	22.52	17.72	14.37	9.08	3.88	1.57357
Gahnite		100	95.05	86.07	76.93	68.75	60.6	53.2	45.6	39.41	33.77	29.77	25.43	22.87	19.93	17.18	13.42	10.06	7.71	5.29	3.51	2.86	2.08443
Olivine		100	82.64	70.08	59.15	52.19	46.51	39.83	36.64	32.27	23.69	20.21	19.18	17.68	13.34	10.39	9.76	9.19	8.32	7.07	6.39	5.47	2.25546
Glass		100	88.14	75.34	65.5	57.06	50.02	44.3	38.97	35.27	32.19	28.54	23.28	20.97	17.24	13.41	11.4	9.38	7.77	4.19	3.28	2.89	2.26174
Diopside		100	95.77	90.79	85.15	81.13	76.95	70.43	65.09	59.16	52.38	46.16	39.98	32.44	26.52	20.32	15.77	10.44	7.72	5.04	3.34	1.85	1.47135
Horizon A
SilOxMix		100	69.77	53.02	41.3	32.2	28.94	23.03	20.75	18	16.97	13.2	11.07	10.43	9.96	7.55	6.49	5.41	4.98	3.78	3.08	0.86	3.36241
OxideSilMIx		100	43.01	23.35	15.72	11.48	7.72	6.47	5.84	4.54	4.24	4	3.83	3.67	3.53	3.4	3.28	3.19	3.14	3.05	3.03	2.93	7.36473
FeMgOPb mix		100	65.85	47.58	37.33	29.32	24.23	21.59	18.88	16.95	14.18	12.57	11.8	8.9	6.32	5.41	5.2	4.15	3.74	2.23	2.19	2.1	3.48782
SilOxidePb-mix2		100	58.49	46.76	37.52	30.43	25.82	20.88	17.68	14.47	13.97	10.48	10	6.76	5.99	5.52	5.32	5.21	4.99	4.8	4.15	3.73	3.30826
ZnFeOSilicatemixPb		100	60	36.93	25.61	19.7	13.85	10.19	7.89	5.7	5.49	2.94	2.83	2.71	2.63	2.55	2.51	2.46	2.44	2.4	1.57	1.51	7.60456
Glass		100	99.24	98.02	96.63	95.14	93.29	91.67	89.73	87.76	85.9	84.16	81.27	78.19	75.19	72.2	67.87	63.38	56.35	47.15	33.18	3.06	1.10598
FeCaO		100	43.78	28.61	23.28	18.91	13.28	8.48	7.28	6.14	5	4.18	4.1	4.05	4.03	2.62	2.51	2.13	1.39	1.09	1.08	1.08	6.01374
Franklinite		100	98.1	95.65	92.77	89.08	85.98	82.63	79.34	74.5	71.16	67.49	62.93	57.29	51.76	43.92	38.58	32.61	26.79	20.87	12.32	1.72	1.23645
Gahnite		100	93.13	84.85	78.97	72.81	67.37	63.07	57.75	51.78	46.83	41.41	35.82	31.3	25.61	20.55	15.24	12.38	9.16	7.19	4.57	1.14	1.61264
Olivine		100	91.92	85.02	76.89	69.83	62.77	58.3	52.85	48.5	44.64	39.17	33.76	30.15	27.24	22.03	18.56	17.22	11.92	7.6	4.86	1.58	1.73926
Almandine		100	88.74	77.04	68.62	61.66	54.84	49.42	45.32	42.4	39.99	37.77	36.02	34.68	33.12	32.35	31.4	30.71	29.49	27.23	23.17	5.04	1.95808
Diopside		100	98.09	95.18	91.74	87.55	83.16	78.37	74.35	68.52	63.93	58.41	52.78	45.7	40.5	35.31	31.12	26.82	21.97	17.62	13.13	0.61	1.3193
Horizon B
SilOxMix		100	87.1	79.07	72.34	65.43	58.09	50.33	43.45	38.39	34.03	30.83	29.11	23.39	20.39	16.02	11.27	7.97	5.79	2.69	0.61	0.6	2.0046
OxideSilMIx		100	55.63	42.21	37.69	30.07	25.98	21.68	16.84	16.84	5.48	5.1	2.86	2.83	2.83	2.56	2.45	2.4	2.4	2.4	2.4	2.4	3.30344
FeMgOPb mix		100	64.34	42.25	32.54	26.84	21.24	17.05	13.99	11.71	9.9	7.44	5.94	4.86	3.48	3	2.44	2.12	2.08	1.8	1.56	1.55	4.599
SilOxidePb-mix2		100	75.9	58.24	52.34	45.87	39.39	31.45	24.95	15.76	9.63	9.63	9.63	7.62	6.97	6.95	4.75	4.5	4.5	4.5	4.28	4.28	3.04208
ZnFeOSilicatemixPb		100	62.12	51.96	30.87	21.45	13.6	6.97	3.08	3.08	3.05	3	2.93	2.92	2.92	2.92	2.92	2.92	2.83	2.77	2.77	2.71	20.1688
Hematite		100	99.93	99.8	99.65	99.44	99.19	99.01	98.75	98.47	98.18	97.79	97.22	96.29	95.47	94.47	93.23	91.64	88.68	81.59	62.52	4.27	1.01195
FeCaO		100	66	48.75	38.39	31.91	25.36	22.86	19.13	17.05	14.98	13.03	12.57	11.15	8.78	8.03	6.44	4.4	3.94	2.4	2	1.51	3.45008
Franklinite		100	99.12	97.64	96.57	95.54	94.45	91.85	90	89.45	86.68	84.74	82.38	80.36	78.5	75.54	70.84	64.41	53.39	41.03	25.65	5.42	1.10133
Gahnite		100	70.24	54.26	45.81	39.16	33.09	29.18	25.12	21.76	17.94	14.48	11.43	9.49	8.59	7.91	6.49	3.97	2.98	1.67	1.46	1.31	2.79618
Olivine		100	93.74	86.83	85.33	82.43	77.7	73.45	71.22	69.28	69.09	67.69	67.54	67.21	67.07	63.68	61.07	51.91	51.91	51.46	43.1	3.69	1.3162
Glass/Garnet		100	91.79	87.94	85.28	82.86	80.61	78.44	76.53	75.02	72.7	70.83	68.43	65.63	63.52	59.86	57.34	55.12	52.47	47.54	42.75	10.08	1.1994
Diopside		100	98.63	96.87	95.03	94.14	90.68	88.56	84.98	83.19	80.37	79.05	75.5	72.15	70.33	64.18	60.15	52.84	49.84	43.35	25.88	2.02	1.16063
unmagnetic
Ilmenite		100	96.24	96	95.86	95.66	95.03	93.06	93.06	93.03	92.58	92.57	92.57	92.53	91.91	91.88	91.88	90.68	84.29	84.29	71.95	6.31	1.03417
Rutile		100	99.99	99.9	99.82	99.79	99.64	99.49	99.23	99.19	98.57	98.36	97.48	96.62	95.82	94.77	92.03	90.03	86.27	82.69	73.84	8.07	1.00766
Spessartine		100	96.51	96.51	96.51	96.51	96.51	96.51	96.51	96.51	95.33	95.33	95.33	95.33	95.33	95.33	95.33	95.33	95.33	0.82	0.82	0.82	1
Titanite		100	99.02	98.86	98.86	97.95	97.95	97.66	97.66	97.66	90.64	87.78	87.78	87.78	87.78	82.82	82.82	82.82	82.82	77.72	76.56	21.55	1.01393
Apatite		100	99.19	99.15	99.13	99.13	99.13	99.13	99.13	99.13	99.13	99.13	99.13	99.13	99.06	94.08	94.02	94.02	89.67	89.67	88.52	18.89	1.00061
Barite		100	99.95	99.95	99.94	99.94	99.94	99.82	99.6	99.6	99.6	99.6	99.6	99.08	99.07	99.07	98.65	98.64	97.74	97.69	95.87	26.67	1.00351
Pirite		100	99.96	99.87	99.86	99.86	99.85	99.85	99.84	99.84	99.47	99.46	97.53	97.53	97.09	96.86	95.76	93.28	90.07	80.4	43.43	0.24	1.0012
Zircon		100	99.95	99.94	99.76	99.62	99.62	99.59	99.51	99.3	99.3	99.16	99.04	99.04	99.04	98.86	98.65	98.65	98.22	97.74	96.75	28.01	1.00442
Chloritoid		100	99.92	99.92	99.85	99.84	99.84	99.64	99.64	99.48	99.42	99.16	99.15	98.86	95.75	95.74	94.08	93.91	91.93	87.26	74	39.02	1.00281
Ilmenite		100	99.2	99.03	98.92	98.76	98.65	98.55	98.52	98.28	97.74	97.66	97.45	97.01	96.39	95.47	94.87	93.9	92.3	89.57	83.93	31.3	1.0069
Rutile		100	99.98	99.92	99.83	99.78	99.76	99.58	99.42	99.17	98.66	97.79	96.82	95.87	94.89	93.66	92.18	89.98	86.99	82.17	74.48	4.02	1.00563
Spessartine
Titanite		100	99.7	99.33	99.31	99.31	99.31	99.31	99.31	99.31	96.45	96.45	96.45	96.45	96.4	96.4	96.4	90.72	88.21	85.25	80.87	10.63	1.00393
Apatite		100	99.07	98.89	98.89	98.89	98.89	98.89	98.89	98.42	97.83	97.83	97.83	97.83	96.42	95.09	95.09	95.09	95.09	95.09	86.22	25.03	1.00182
Barite		100	99.75	99.65	99.65	99.65	99.65	99.65	99.54	99.54	99.52	99.52	99.47	99.45	99.45	99.44	99.43	99.43	99.41	99.41	98.88	13.38	1.00211
Pirite		100	99.95	99.9	99.86	99.86	99.86	99.81	99.68	99.68	99.68	99.68	99.68	99.11	99.09	98.81	98.8	98.72	96.81	93.51	63.23	1.57	1.00271
Zircon		100	99.95	99.93	99.81	99.81	99.81	99.61	99.5	99.39	99.33	99.31	99.17	99.17	99.17	99.14	99.06	99.06	98.96	98.87	97.87	16.96	1.00452
Chloritoid		100	99.93	99.91	99.9	99.87	99.87	99.85	99.85	99.58	99.58	99.39	99.19	99.15	98.72	97.99	97.54	96.89	92.95	90.11	82.96	15.35	1.0008
